# Supplementary material for: Clinical Relevance of the Relationship between Trabecular Bone Score and Metabolic Syndrome
Source: HighWire-hosted journal article supplement (doi:10.1136/jim-2021-002009), 2022-01-11
Supplement: jim-2021-002009supp001_data_supplement.pdf [file jim-2021-002009supp001_data_supplement.pdf]

**Table S1. Regression coefficients of number of MetS components for Trabecular Bone Score in subpopulation.**

| Variables                      | Model 1 <sup>a</sup><br>$\beta^b$ (95% CI) | P<br>Value | Model 2 <sup>a</sup><br>$\beta^b$ (95% CI) | P<br>Value | Model 3 <sup>a</sup><br>$\beta^b$ (95% CI) | P<br>Value | Model 4 <sup>a</sup><br>$\beta^b$ (95% CI) | P<br>Value |
|--------------------------------|--------------------------------------------|------------|--------------------------------------------|------------|--------------------------------------------|------------|--------------------------------------------|------------|
| <b>Mexican American male</b>   |                                            |            |                                            |            |                                            |            |                                            |            |
| <b>1</b>                       | -0.020(-0.049,0.010)                       | 0.188      | -0.005(-0.034,-0.023)                      | 0.714      | 0.021(-0.004,0.045)                        | 0.095      | 0.021(-0.003,0.046)                        | 0.086      |
| <b>2</b>                       | -0.047(-0.077,-0.016)                      | 0.003      | -0.029(-0.059,0.001)                       | 0.056      | 0.014(-0.012,0.040)                        | 0.290      | 0.016(-0.010,0.041)                        | 0.229      |
| <b>3</b>                       | -0.097(-0.131,-0.064)                      | <0.001     | -0.079(-0.111,-0.046)                      | <0.001     | 0.005(-0.025,0.035)                        | 0.744      | 0.006(-0.025,0.036)                        | 0.720      |
| <b>≥4</b>                      | -0.165(-0.200,-0.129)                      | <0.001     | -0.128(-0.164,-0.092)                      | <0.001     | -0.027(-0.061,0.008)                       | 0.125      | -0.028(-0.062,0.007)                       | 0.115      |
| <b>Mexican American female</b> |                                            |            |                                            |            |                                            |            |                                            |            |
| <b>1</b>                       | -0.067(-0.103,-0.031)                      | <0.001     | -0.051(-0.083,-0.018)                      | 0.003      | -0.025(-0.057,0.007)                       | 0.121      | -0.023(-0.055,0.009)                       | 0.161      |
| <b>2</b>                       | -0.105(-0.141,-0.069)                      | <0.001     | -0.081(-0.115,-0.048)                      | <0.001     | -0.035(-0.068,-0.001)                      | 0.045      | -0.034(-0.068,0.000)                       | 0.047      |
| <b>3</b>                       | -0.091(-0.127,-0.056)                      | <0.001     | -0.060(-0.093,-0.026)                      | 0.001      | -0.008(-0.043,0.026)                       | 0.644      | -0.007(-0.041,0.028)                       | 0.710      |
| <b>≥4</b>                      | -0.157(-0.195,-0.120)                      | <0.001     | -0.105(-0.142,-0.068)                      | <0.001     | -0.045(-0.084,-0.006)                      | 0.023      | -0.045(-0.084,-0.006)                      | 0.026      |
| <b>Other Hispanic male</b>     |                                            |            |                                            |            |                                            |            |                                            |            |
| <b>1</b>                       | -0.042(-0.109,0.025)                       | 0.209      | -0.041(-0.108,0.027)                       | 0.231      | -0.038(-0.106,0.030)                       | 0.262      | -0.042(-0.114,0.031)                       | 0.249      |
| <b>2</b>                       | -0.061(-0.123,0.002)                       | 0.057      | -0.057(-0.122,0.007)                       | 0.079      | -0.033(-0.102,0.035)                       | 0.335      | -0.036(-0.107,0.036)                       | 0.320      |
| <b>3</b>                       | -0.082(-0.181,0.017)                       | 0.103      | -0.074(-0.178,0.030)                       | 0.160      | -0.052(-0.156,0.052)                       | 0.322      | -0.041(-0.153,0.071)                       | 0.463      |
| <b>≥4</b>                      | -0.184(-0.251,-0.118)                      | <0.001     | -0.180(-0.249,-0.111)                      | <0.001     | -0.128(-0.217,-0.039)                      | 0.006      | -0.125(-0.217,-0.033)                      | 0.009      |
| <b>Other Hispanic female</b>   |                                            |            |                                            |            |                                            |            |                                            |            |
| <b>1</b>                       | -0.030(-0.107,0.048)                       | 0.440      | -0.023(-0.090,0.043)                       | 0.479      | 0.007(-0.057,0.071)                        | 0.824      | 0.002(-0.063,0.067)                        | 0.959      |
| <b>2</b>                       | -0.050(-0.128,0.027)                       | 0.199      | -0.015(-0.083,0.054)                       | 0.663      | 0.034(-0.035,0.103)                        | 0.323      | 0.034(-0.036,0.103)                        | 0.333      |
| <b>3</b>                       | -0.113(-0.190,-0.035)                      | 0.005      | -0.059(-0.131,0.013)                       | 0.104      | -0.032(-0.101,0.037)                       | 0.355      | -0.031(-0.103,0.041)                       | 0.394      |
| <b>≥4</b>                      | -0.170(-0.305,-0.035)                      | 0.015      | -0.045(-0.176,0.087)                       | 0.499      | -0.029(-0.148,0.091)                       | 0.630      | -0.029(-0.148,0.090)                       | 0.625      |
| <b>Non-Hispanic male</b>       |                                            |            |                                            |            |                                            |            |                                            |            |
| <b>1</b>                       | -0.051(-0.070,-0.031)                      | <0.001     | -0.028(-0.046,-0.009)                      | 0.004      | 0.016(0.00,0.033)                          | 0.048      | 0.016(0.00,0.032)                          | 0.049      |
| <b>2</b>                       | -0.071(-0.091,-0.051)                      | <0.001     | -0.048(-0.067,-0.029)                      | <0.001     | 0.019(0.001,0.036)                         | 0.036      | 0.019(0.001,0.036)                         | 0.034      |
| <b>3</b>                       | -0.127(-0.147,-0.106)                      | <0.001     | -0.097(-0.117,-0.077)                      | <0.001     | -0.001(-0.021,0.019)                       | 0.918      | 0.00(-0.020,0.019)                         | 0.985      |
| <b>≥4</b>                      | -0.161(-0.184,-0.137)                      | <0.001     | -0.129(-0.152,-0.106)                      | <0.001     | -0.012(-0.035,0.011)                       | 0.295      | -0.013(-0.035,0.010)                       | 0.268      |

|           | Non-Hispanic female       |        |                       |        |                       |        |                       |        |
|-----------|---------------------------|--------|-----------------------|--------|-----------------------|--------|-----------------------|--------|
| <b>1</b>  | -0.037(-0.057,-0.018)     | <0.001 | -0.020(-0.037,-0.003) | 0.023  | 0.012(-0.004,0.029)   | 0.136  | 0.011(-0.005,0.028)   | 0.170  |
| <b>2</b>  | -0.093(-0.114,-0.073)     | <0.001 | -0.048(-0.067,-0.029) | <0.001 | 0.009(-0.010,0.028)   | 0.360  | 0.010(-0.009,0.029)   | 0.298  |
| <b>3</b>  | -0.112(-0.133,-0.091)     | <0.001 | -0.075(-0.094,-0.056) | <0.001 | 0.00(-0.021,0.021)    | 0.991  | 0.001(-0.019,0.022)   | 0.886  |
| <b>≥4</b> | -0.156(-0.182,-0.131)     | <0.001 | -0.100(-0.123,-0.077) | <0.001 | -0.018(-0.042,0.007)  | 0.154  | -0.018(-0.042,0.006)  | 0.146  |
|           | Non-Hispanic Black male   |        |                       |        |                       |        |                       |        |
| <b>1</b>  | -0.065(-0.090,-0.041)     | <0.001 | -0.055(-0.079,-0.030) | <0.001 | -0.025(-0.048,-0.003) | 0.029  | -0.029(-0.051,-0.007) | 0.011  |
| <b>2</b>  | -0.086(-0.115,-0.057)     | <0.001 | -0.068(-0.097,-0.038) | <0.001 | -0.018(-0.046,0.010)  | 0.202  | -0.021(-0.049,0.007)  | 0.137  |
| <b>3</b>  | -0.121(-0.157,-0.086)     | <0.001 | -0.102(-0.138,-0.066) | <0.001 | -0.045(-0.079,-0.011) | 0.009  | -0.043(-0.076,-0.010) | 0.011  |
| <b>≥4</b> | -0.185(-0.222,-0.149)     | <0.001 | -0.166(-0.202,-0.129) | <0.001 | -0.087(-0.124,-0.051) | <0.001 | -0.091(-0.127,-0.055) | <0.001 |
|           | Non-Hispanic Black female |        |                       |        |                       |        |                       |        |
| <b>1</b>  | -0.071(-0.103,-0.039)     | <0.001 | -0.054(-0.085,-0.023) | 0.001  | -0.006(-0.036,0.023)  | 0.676  | -0.008(-0.038,0.022)  | 0.583  |
| <b>2</b>  | -0.149(-0.182,-0.117)     | <0.001 | -0.114(-0.147,-0.082) | <0.001 | -0.046(-0.079,-0.013) | 0.006  | -0.048(-0.081,-0.015) | 0.005  |
| <b>3</b>  | -0.165(-0.203,-0.128)     | <0.001 | -0.109(-0.149,-0.070) | <0.001 | -0.037(-0.076,0.002)  | 0.063  | -0.038(-0.078,0.001)  | 0.059  |
| <b>≥4</b> | -0.197(-0.242,-0.152)     | <0.001 | -0.144(-0.190,0.098)  | <0.001 | -0.066(-0.111,-0.022) | 0.004  | -0.070(-0.115,-0.025) | 0.002  |
|           | Other race - male         |        |                       |        |                       |        |                       |        |
| <b>1</b>  | -0.037(-0.141,0.067)      | 0.472  | -0.012(-0.124,0.100)  | 0.828  | 0.006(-0.099,0.111)   | 0.908  | -0.002(-0.102,0.099)  | 0.971  |
| <b>2</b>  | -0.078(-0.175,0.020)      | 0.115  | -0.055(-0.159,-0.049) | 0.295  | 0.013(-0.094,0.120)   | 0.812  | 0.012(-0.088,0.112)   | 0.811  |
| <b>3</b>  | -0.182(-0.288,-0.076)     | 0.001  | -0.156(-0.270,-0.043) | 0.008  | -0.060(-0.183,0.064)  | 0.335  | -0.051(-0.167,0.066)  | 0.384  |
| <b>≥4</b> | -0.136(-0.256,-0.160)     | 0.027  | -0.100(-0.234,0.034)  | 0.141  | 0.024(-0.125,0.173)   | 0.748  | 0.038(-0.102,0.179)   | 0.583  |
|           | Other race – female       |        |                       |        |                       |        |                       |        |
| <b>1</b>  | -0.035(-0.103,-0.039)     | 0.201  | -0.020(-0.070,0.029)  | 0.411  | -0.001(-0.045,0.044)  | 0.976  | -0.008(-0.056,-0.041) | 0.754  |
| <b>2</b>  | -0.117(-0.182,-0.117)     | <0.001 | -0.104(-0.158,-0.050) | <0.001 | -0.036(-0.091,0.019)  | 0.193  | -0.037(-0.096,0.023)  | 0.222  |
| <b>3</b>  | -0.114(-0.203,-0.128)     | 0.001  | -0.082(-0.141,-0.022) | 0.008  | -0.026(-0.083,0.031)  | 0.362  | -0.032(-0.092,0.028)  | 0.287  |
| <b>≥4</b> | -0.161(-0.242,-0.152)     | 0.001  | -0.126(-0.211,-0.041) | 0.004  | -0.031(-0.122,0.059)  | 0.490  | -0.041(-0.135,0.052)  | 0.377  |

<sup>a</sup> Adjusted covariates:

Model 1: unadjusted

Model 2: adjustment for age, race

Model 3: adjustment for age, race, body mass index, C-reactive protein

Model 4: adjustment for age, race, body mass index, C-reactive protein, cigarette smoking, ever told you had congestive heart failure, ever told you had coronary heart disease, ever told you had cancer or malignancy

$\beta^b$  was interpreted as change of Trabecular Bone Score for each increase in MetS
